# Supplementary material for: Summary of BARD1 Mutations and Precise Estimation of Breast and Ovarian Cancer Risks Associated with the Mutations
Source: MDPI journal article supplement (doi:10.3390/genes11070798), 2020-07-15
Supplement: s1 [file s1]

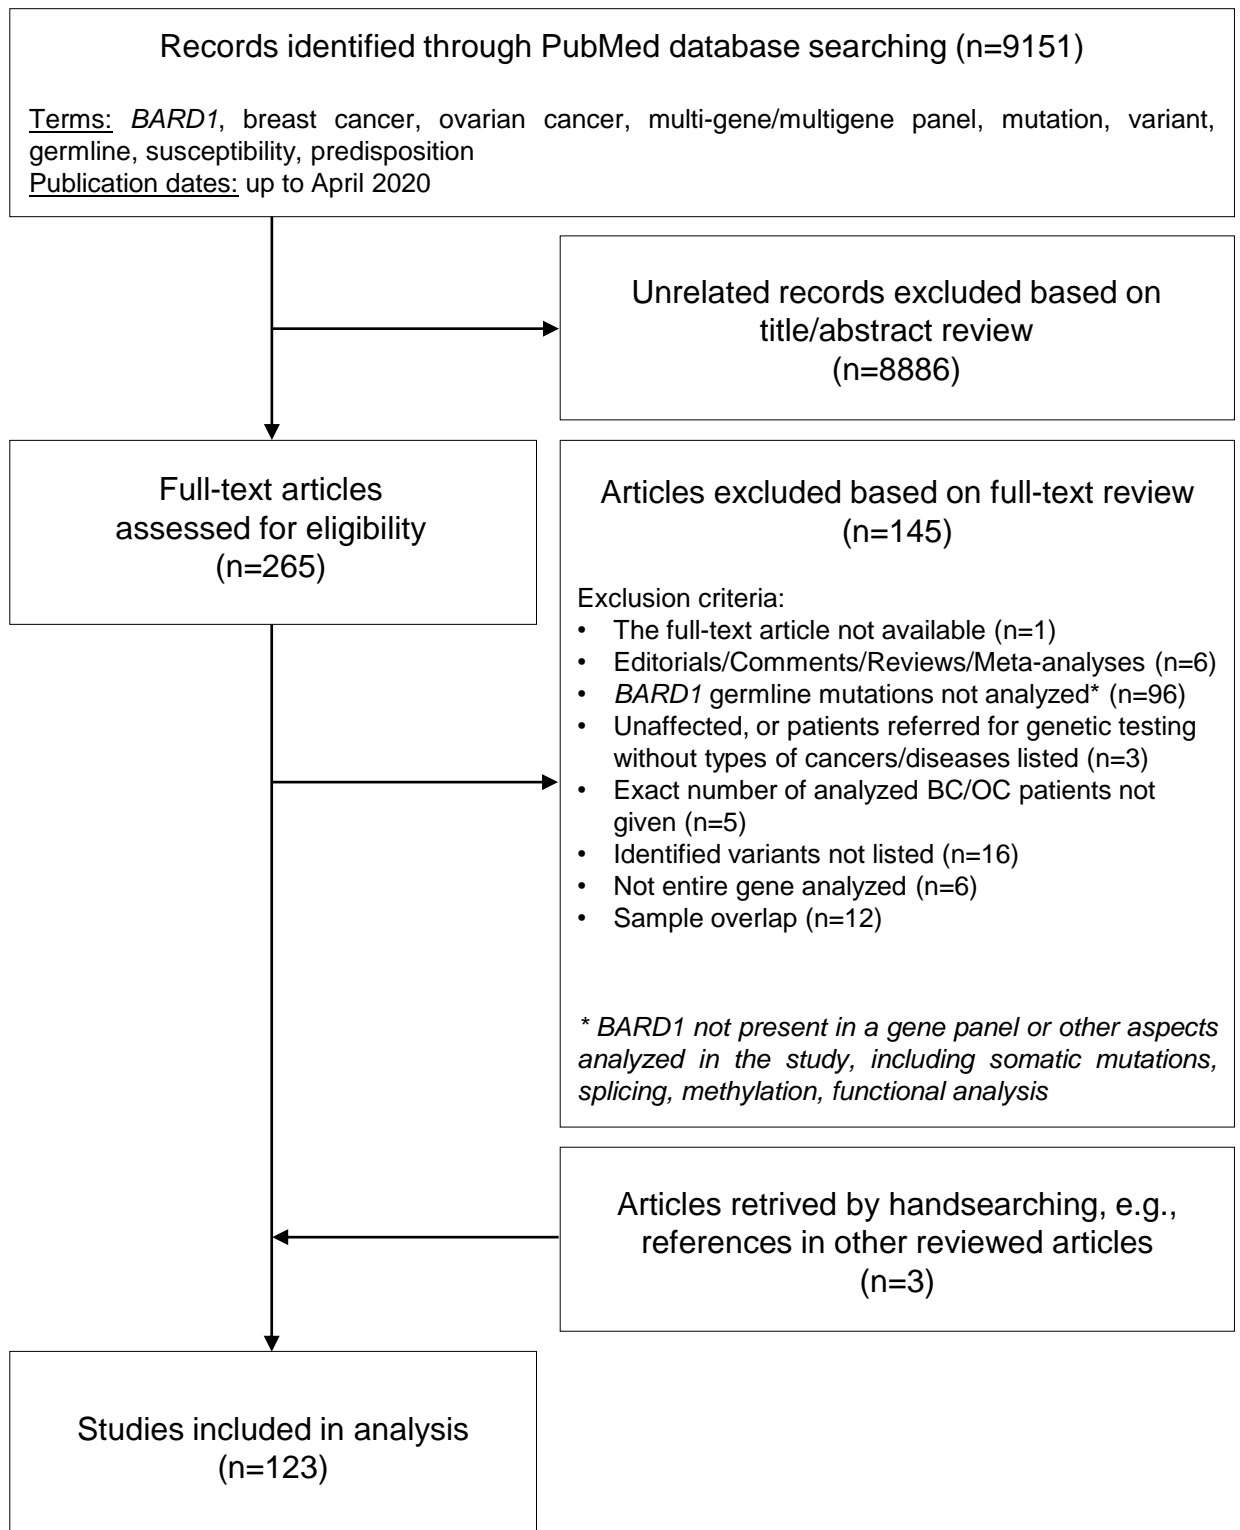

Figure S1. The flow diagram indicating the strategy and criteria used for the selection of articles for the analysis.
