# Supplementary material for: Summary of BARD1 Mutations and Precise Estimation of Breast and Ovarian Cancer Risks Associated with the Mutations
Source: Genes (Basel). 2020 Jul 15;11(7):798. doi: 10.3390/genes11070798 (PMC7397132; doi:10.3390/genes11070798)
Supplement: Supplementary file 1 [file genes-11-00798-s001.zip › Supplementary Figure and Tables_Suszynska et al_Genes/Supplementary Table S1_Suszynska et al_Genes.xlsx]

## Sheet: Table S1
	Table S1. Characteristics of the studies included in the study.
	Study, Journal, Year	Country/Predominant ethnicity	Mutations No.	Case No.	Method	Family history of cancers1	BRCA1/2 status	Comments
	Ovarian cancer (OC)
	Lilyquist, Gynecol Oncol, 2017	USA/Caucasian	8	6294	NGS	45% FHBC, 15% FHOC	-
	Carter, Gynecol Oncol, 2018	USA/Caucasian:75%	4 + 2LM	4439	NGS	19% FHOC	-
	Ramus, J Natl Cancer Inst, 2015	UK, USA, Australia, Germany, Belarus/Caucasian	4	3261	NGS	19% FHBOC	-
	Norquist, JAMA Oncol, 2016	USA/Caucasian:88%	4	1915	NGS	% not provided	-
	Feliubadaló, Int J Cancer, 2019	Spain/Caucasian	1	262	NGS	% not provided	-	26/262 also reported a personal history of BC
	Kwong, J Mol Diagn, 2020	Hong Kong/Asian	1	142	NGS	30% FHBC, 4% FHOC	BRCA1/2neg	40/142 also reported a personal history of BC
	Hajkova, Oncol Lett, 2019	Czech Republic, Hungary/Caucasian	1	22	NGS	% not provided	-	Patients with synchronous endometrial cancer and OC
	Harter, PLoS One, 2017	Germany/Caucasian	0	523	NGS	43% FHBOC	-
	Weber-Lassalle, Breast Cancer Res, 2019	Germany/Caucasian	0	451	NGS	100% FHBOC	BRCA1/2neg
	Shao, Cancer Sci, 2020	China/Asian	0	448	NGS	13% FHBOC	-	19/448 also reported a personal history of BC
	Lu, Nat Commun, 2015	The Cancer Genome Atlas cases/Caucasian:91%	0	429	NGS (WES)	% not provided	-
	Hjortkjær, Int J Gynecol Cancer, 2019	Denmark/Caucasian	0	380	NGS	% not provided	-
	Koczkowska, Cancers, 2018	Poland/Caucasian	0	333	NGS	% not provided	-
	Hirasawa, Oncotarget, 2017	Japan/Asian	0	230	NGS	14% FHBC, 7% FHOC	-
	Sugino, Sci Rep, 2019	Japan/Asian	0	207	NGS	% not provided	-
	Eoh, Cancer Res Treat, 2018	South Korea/Asian	0	117	NGS	55% FHC, 13% FHBOC	-	7/117 also reported a personal history of BC
	Siraj, Hum Genet, 2017	Saudi Arabia/Arabian	0	117	NGS	7% FHC	-
	Brovkina, Front Oncol, 2018	Russia/Caucasian	0	111	NGS	100% FHBOC	-
	Shirts, Genet Med, 2016	USA/-	0	111	NGS	% not provided	-
	Crawford, Breast Cancer Res Treat, 2017	USA/Caucasian:65%	0	99	NGS	% not provided	BRCA1/2neg
	Hirotsu, Mol Genet Genomic Med, 2015	Japan/Asian	0	79	NGS	94% FHC	BRCA1/2neg (~93% of patients tested)	10/79 also reported a personal history of BC
	Li, Proc Natl Acad Sci USA, 2019	USA, Italy/-	0	77	NGS (WES)	% not provided	-
	Li, J Ovarian Res, 2019	China/Asian	0	62	NGS	16% FHBOC	-	5/62 also reported a personal history of BC
	Zhao, J Gynecol Oncol, 2017	China/Asian	0	50	NGS	22% FHC	-
	Frey, Gynecol Oncol, 2017	USA/Caucasian:80%	0	49	NGS	70% FHBC, 14% FHOC	-
	Choi, Cancer Res Treat, 2020	South Korea/Asian	0	48	NGS	22% FHBOC	-
	Stafford, PLoS One, 2017	USA/Caucasian	0	48	NGS (WES)	65% FHBC, 29% FHOC	BRCA1/2neg
	Yoo, Ann Lab Med, 2020	South Korea/Asian	0	48	NGS	31% FHC	BRCA1/2neg	1/48 also reported a personal history of BC
	Jorge, Gynecol Oncol, 2020	USA/Caucasian:72%	0	43	NGS	21% FHBOC	-
	Tsaousis, BMC Cancer, 2019	Greece, Romania, Turkey/Caucasian	0	42	NGS	84% FHC	-
	Tung, Cancer, 2015	USA/Caucasian:65%	0	40	NGS	36% FHBOC	-	40/40 also reported a personal history of BC
		USA/Caucasian:91%	0	7	NGS	44% FHBOC	BRCA1/2neg	7/7 also reported a personal history of BC
	Bonache, J Cancer Res Clin Oncol, 2018	Spain/Caucasian	0	38	NGS	% not provided	BRCA1/2neg
	Bernards, Gynecol Oncol, 2016	USA/-	0	36	NGS	36% FHBOC	-	Early-onset OC (<40 years of age)
	Chirasophon, J Obstet Gynaecol Res, 2017	Thailand/Asian	0	35	NGS	4% FHBOC	-
	Bertelsen, NPJ Genom Med, 2019	Denmark/Caucasian	0	23	NGS (WES)	% not provided	-
	Kanke, Oncotarget, 2018	Japan/Asian	0	19	NGS (WES)	% not provided	-	Early-onset OC (<40 years of age)
	Mandelker, JAMA, 2017	USA/-	0	19	NGS	% not provided	-
	Wong, NPJ Genom Med, 2016	Singapore/Asian	0	19	NGS	87% FHBC, 13% FHOC	-
	Caminsky, Hum Mutat, 2016	Canada/-	0	17	NGS	95% FHBOC	BRCA1/2neg
	Yablonski-Peretz, Breast Cancer Res Treat, 2016	Israel/Ashkenazim:53%	0	15	NGS	% not provided	-
	Li, Int J Cancer, 2019	China/Asian	0	10	NGS	40% FHBOC	-	10/10 also reported a personal history of BC
	Lerner-Ellis, J Med Genet, 2019	Canada/-	0	9	NGS	% not provided	BRCA1/2neg
	Teer, Sci Rep, 2017	USA/-	0	9	NGS (WES)	% not provided	-
	Zidan, Breast Cancer Res Treat, 2017	Israel/Arabian	0	9	NGS	100% FHBOC	-
	Churpek, Breast Cancer Res Treat, 2015	USA/African Americans	0	7	NGS	64% FHBC, 13% FHOC	-	7/7 also reported a personal history of BC
	Cock-Rada, Fam Cancer, 2018	Colombia/Latino	0	7	NGS	% not provided	-	1/7 also reported a personal history of BC
	Sung, PLoS One, 2017	Taiwan/Asian	0	7	NGS	% not provided	-	1/7 also reported a personal history of BC
	Vahteristo, Eur J Hum Genet, 2006	Finland/Caucasian	0	7	CSGE, then S	% not provided	-	7/7 also reported a personal history of BC
	da Costa e Silva Carvalho, BMC Med Genomics, 2020	Brazil/Latino	0	6	NGS	83% FHC	-	1/6 also reported a personal history of BC
	Lin, Oncotarget, 2016	Taiwan/Asian	0	5	NGS	% not provided	-	5/5 also reported a personal history of BC
	Ng, Clin Genet, 2016	Malaysia/Asian	0	4	NGS	63% FHBC	-	4/4 also reported a personal history of BC
	Glentis, Front Genet, 2019	Greece/Caucasian	0	4	NGS (WES)	50% FHBOC	BRCA1/2neg	1/4 also reported a personal history of BC
	Wang, BMC Cancer, 2018	Taiwan/Asian	0	4	NGS	50% FHBOC	-	4/4 also reported a personal history of BC
	Ghimenti, Genes Chromosomes Cancer, 2002	Italy/Caucasian	0	3	SSCP, then S	100% FHBOC	BRCA1/2neg	2/3 also reported a personal history of BC
	Maksimenko, Hered Cancer Clin Pract, 2018	Latvia/Caucasian	0	2	NGS	100% FHBOC	BRCA1/2neg2	1/2 also reported a personal history of BC
	Coppa, Cancer Med, 2018	Italy/Caucasian	0	1	NGS	100% FHBOC	BRCA1/2neg	1/1 also reported a personal history of BC
	Breast cancer (BC)
	Sun, Clin Cancer Res, 2017	China/Asian	15	8085	NGS	10% FHBOC	-
	Susswein, Genet Med, 2016	USA/Caucasian:82%	7	5260	NGS	% not provided	-
	Weber-Lassalle, Breast Cancer Res, 2019	Germany/Caucasian	23	4469	NGS	100% FHBOC	BRCA1/2neg
	Thompson, J Clin Oncol, 2016	Australia/Caucasian	3	2000	NGS	100% FHBC	BRCA1/2neg2	95% of patients had a primary diagnosis of BC; the majority of patients were BC patients, however small fraction of OC patients may also be included
	Couch, J Clin Oncol, 2015	USA, Germany, Greece, UK, Finland/Caucasian:97%	9	1824	NGS	34% FHBC, 4% FHOC	-	TNBC
	Tung, Cancer, 2015	USA/Caucasian:65%	5 + 1LM	1781	NGS	36% FHBOC	-	40/1781 also reported a personal history of OC
		USA/Caucasian:91%	1	377	NGS	44% FHBOC	BRCA1/2neg	7/377 also reported a personal history of OC
	Kwong, J Mol Diagn, 2020	Hong Kong/Asian	3 + 1LM	1232	NGS	30% FHBC, 4% FHOC	BRCA1/2neg	40/1232 also reported a personal history of OC
	Zheng, J Clin Oncol, 2018	Nigeria/African	3	1136	NGS	6% FHBC	-
	Li, Int J Cancer, 2019	China/Asian	5	937	NGS	40% FHBOC	-	10/937 also reported a personal history of OC
	Lu, Nat Commun, 2015	The Cancer Genome Atlas cases/Caucasian:84%	1	770	NGS (WES)	% not provided	-
	Tsaousis, BMC Cancer, 2019	Greece, Romania, Turkey/Caucasian	3	768	NGS	84% FHC	-
	Castera, Eur J Hum Genet, 2014	France/Caucasian	1	708	NGS	% not provided	-	The majority of patients were BC patients, however small fraction of OC patients or unaffected from familial BC and/or OC studies may also be included
	Siraj, Hum Genet, 2017	Saudi Arabia/Arabian	1	698	NGS	32% FHC	-
	Li, J Med Genet, 2016	Australia/Caucasian	2	660	NGS	100% FHBC	BRCA1/2neg (most of the group tested)
	Feliubadaló, Int J Cancer, 2019	Spain/Caucasian	4	618	NGS	% not provided	-	26/618 also reported a personal history of OC
	Cybulski, Int J Cancer, 2019	Poland/Caucasian	2	617	NGS (WES)	100% FHBC	BRCA1/2neg2
	Eliade, Oncotarget, 2017	France/Caucasian	2 (1 in BC & 1 in OC)	583	NGS	% not provided	-	The majority of patients were BC patients, however small fraction of OC patients or unaffected from familial BC and/or OC studies may also be included
	Pritzlaff, Breast Cancer Res Treat, 2017	USA/Caucasian:66%	2	564	NGS	6% FH Male BC	-	Male BC
	Rizzolo, Int J Cancer, 2019	Italy/Caucasian	2	523	NGS	17% FHBOC	BRCA1/2neg (most of the group tested)	Male BC
	Wang, Cancer Med, 2019	China/Asian	2	481	NGS	100% FHBOC	-
	Wang, BMC Cancer, 2018	Taiwan/Asian	1	458	NGS	50% FHBOC	-	4/458 also reported a personal history of OC
	Lolas Hamameh, Int J Cancer, 2017	Palestine, Israel/Arabian	4	453	NGS	59% FHBOC	-
	Hahnen, JAMA Oncol, 2017	Germany/Caucasian	1	291	NGS	38% FHBOC	-	TNBC
	Churpek, Breast Cancer Res Treat, 2015	USA/African Americans	1	289	NGS	64% FHBC, 13% FHOC	-	7/289 also reported a personal history of OC
	Maxwell, Genet Med, 2015	USA/Caucasian:69%	1	278	NGS	68% FHBC	BRCA1/2neg	Early-onset BC (<40 years of age)
	Adedokun, Cancer Epidemiol Biomarkers Prev, 2020	Cameroon, Uganda/African	1LM	196	NGS	7% FHBC	-
	De Brakeleer, Hum Mutat, 2010	Belgium/Caucasian	1	196	DGGE, then S; S	100% FHBOC	BRCA1/2neg	151 families were “BC only” whereas 45 also included OC cases; the majority of patients were BC patients, however small fraction of OC patients may also be included
	Bonache, J Cancer Res Clin Oncol, 2018	Spain/Caucasian	1	150	NGS	% not provided	BRCA1/2neg
	Jian, Hered Cancer Clin Pract, 2017	China/Asian	1	120	NGS	% not provided	-
	Park, BMC Cancer, 2018	South Korea/Asian	2	120	NGS	54% FHBOC	BRCA1/2neg
	Ratajska, Breast Cancer Res Treat, 2012	Poland/Caucasian	2	109	DHPLC, then S	100% FHBOC	BRCA1/2neg	87 families were “BC only” whereas 22 also included OC cases; the majority of patients were BC patients, however small fraction of OC patients may also be included
	Ng, Clin Genet, 2016	Malaysia/Asian	2	108	NGS	63% FHBC	-	4/108 also reported a personal history of OC
	Yadav, Fam Cancer, 2017	USA/Caucasian:92%	1	106	NGS	% not provided	BRCA1/2neg
	González-Rivera, Breast Cancer Res Treat, 2016	Spain, Peru/Caucasian, Latino	2	105	NGS	21% FHBOC	-	TNBC
	Rodríguez-Balada, Clin Biochem, 2020	Spain/Caucasian	1	77	NGS	% not provided	BRCA1/2neg
	De Brakeleer, Clin Genet, 2016	Belgium/Caucasian	2	57	HRM and DGGE, then S	% not provided	-	Estrogen receptor negative BC patients
	Shahi, BMC Cancer, 2019	Belgium/Caucasian	1	54	NGS (WES)	100% FHBC	BRCA1/2neg
	Torrezan, Front Genet, 2018	Brazil/Latino	1	17	NGS (WES)	% not provided	BRCA1/2neg
	Girard, Int J Cancer, 2019	France/Caucasian	0	1207	NGS, NGS (WES)	100% FHBOC	BRCA1/2neg
	LaDuca, Genet Med, 2014	USA/Caucasian:73%	0	1128	NGS	% not provided	-
	Walsh, JAMA Oncol, 2017	USA/Ashkenazim	0	1007	NGS	60% FHBOC	-
	Hata, J Hum Genet, 2020	China/Asian	0	583	NGS	9% FHBC	-
	Chen, Aging, 2020	China/Asian	0	524	NGS	22% FHBOC	-
	Shin, Cancer Res Treat, 2020	South Korea/Asian	0	496	NGS	34% FHBC	-
	Shirts, Genet Med, 2016	USA/-	0	494	NGS	% not provided	-
	Tung, J Clin Oncol, 2016	USA/Caucasian:81%	0	488	NGS	49% FHBOC	-
	Lhota, Clin Genet, 2016	Czech Republic/Caucasian	0	325	NGS	48% FHBC	BRCA1/2neg
	Quezada Urban, Cancers, 2018	Mexico/Latino	0	300	NGS	71% FHC	-
	Shao, Cancer Sci, 2020	China/Asian	0	280	NGS	13% FHBOC	-	19/280 also reported a personal history of OC
	Caminsky, Hum Mutat, 2016	Canada/-	0	277	NGS	95% FHBOC	BRCA1/2neg
	Frey, Gynecol Oncol, 2017	USA/Caucasian:80%	0	251	NGS	70% FHBC, 14% FHOC	-
	Ow, PLoS One, 2019	Singapore/Asian: 85%	0	229	NGS	53% FHBC, 20% FHOC	-	The majority of patients were BC patients, however small fraction of OC patients may also be included
	Crawford, Breast Cancer Res Treat, 2017	USA/Caucasian:65%	0	201	NGS	52% FHOC	BRCA1/2neg
	Wong, NPJ Genom Med, 2016	Singapore/Asian	0	195	NGS	87% FHBC, 13% FHOC	-
	Moran, Breast Cancer Res Treat, 2017	Canada/-	0	190	NGS	100% FHBC	BRCA1/2neg2
	Yablonski-Peretz, Breast Cancer Res Treat, 2016	Israel/Ashkenazim:53%	0	165	NGS	% not provided	-
	Oliver, Front Oncol, 2019	Mexico, Argentina, Guatemala/Latino	0	144	NGS	57% FHC	-	The majority of patients were BC patients, however small fraction of OC patients or unaffected from familial BC and/or OC studies may also be included
	Dominguez-Valentin, Sci Rep, 2019	Norway, UK/Caucasian	0	138	NGS	100% FHBOC	-
	Lin, Oncotarget, 2016	Taiwan/Asian	0	133	NGS	73% FHBC, 11% FHOC	-	5/133 also reported a personal history of OC
	Karppinen, J Med Genet, 2004	Finland/Caucasian	0	126	CSGE, then S	100% FHBOC	-	The majority of patients were BC patients, however small fraction of OC patients may also be included
	Ellingson, Breast Cancer Res Treat, 2015	USA/Caucasian:89%	0	124	NGS (WES)	% not provided	-
	Aloraifi, FEBS J, 2015	Ireland/Caucasian	0	104	NGS	100% FHBC	BRCA1/2neg
	Mandelker, JAMA, 2017	USA/-	0	101	NGS	% not provided	-
	Yang, PLoS One, 2015	China/Asian	0	99	NGS	60%FHBC, 17%FHOC	-
	Guénard, J Hum Genet, 2009	Canada/Caucasian	0	96	S	100% FHBOC	BRCA1/2neg
	Sokolenko, Cancer Lett, 2015	Russia/Caucasian	0	95	HRM, then S	40% FHBOC	BRCA1/2neg
	McVeigh, Ir J Med Sci, 2020	Ireland/Caucasian	0	91	NGS	% not provided	-
	Rajkumar, Asian Pac J Cancer Prev, 2015	India/Asian	0	91	NGS	% not provided	BRCA1/2neg (part of the cohort tested)	The majority of patients were BC patients, however small fraction of OC patients or unaffected from familial BC and/or OC studies may also be included
	Brovkina, Front Oncol, 2018	Russia/Caucasian	0	88	NGS	100% FHBOC	-
	da Costa e Silva Carvalho, BMC Med Genomics, 2020	Brazil/Latino	0	87	NGS	88% FHC	-	1/87 also reported a personal history of OC
	Hirotsu, Mol Genet Genomic Med, 2015	Japan/Asian	0	86	NGS	94% FHC	BRCA1/2neg (~93% of patients tested)	10/86 also reported a personal history of OC
	Bertelsen, NPJ Genom Med, 2019	Denmark/Caucasian	0	85	NGS (WES)	% not provided	-
	Goidescu, Clujul Med, 2018	Romania/Caucasian	0	82	NGS	% not provided	-
	Scarpitta, Breast Cancer Res Treat, 2019	Italy/Caucasian	0	81	NGS	43% FHBC	-	Male BC
	Cock-Rada, Fam Cancer, 2018	Colombia/Latino	0	79	NGS	% not provided	-	1/79 also reported a personal history of OC
	Lerner-Ellis, J Med Genet, 2019	Canada/-	0	77	NGS	% not provided	BRCA1/2neg
	Yoo, Ann Lab Med, 2020	South Korea/Asian	0	73	NGS	24% FHC	BRCA1/2neg	1/73 also reported a personal history of OC
	de Souza Timoteo, Breast Cancer Res Treat, 2018	Brazil/Latino	0	72	NGS	% not provided	-	The majority of patients were BC patients, however small fraction of OC patients or unaffected from familial BC and/or OC studies may also be included
	Guan, Fam Cancer, 2015	China/Asian	0	70	NGS	% not provided	-
	Yi, Hum Genomics, 2019	China/Asian	0	66	NGS	% not provided	-	TNBC
	Rostami, Arch Iran Med, 2020	Iran/Asian	0	61	NGS	100% FHBOC	BRCA1/2neg
	Ishitobi, Cancer Lett, 2003	Japan/Asian	0	60	SSCP, then S	100% FHBOC	BRCA1/2neg
	Zidan, Breast Cancer Res Treat, 2017	Israel/Arabian	0	59	NGS	100% FHBOC	-
	Ollier, Am J Cancer Res, 2015	France/Caucasian	0	50	NGS	100% FHBC	BRCA1/2neg	TNBC
	Dutil, Sci Rep, 2019	Puerto Rico/Latino	0	48	NGS	% not provided	BRCA1/2neg
	Kanke, Oncotarget, 2018	Japan/Asian	0	48	NGS (WES)	% not provided	-	Early-onset BC (<40 years of age)
	Churpek, Cancer, 2016	USA/Caucasian:74%	0	47	NGS	47% FHBC	-	BC patients with therapy-related leukemia
	Dong, Hum Mutat, 2018	China/Asian	0	47	NGS	100% FHBC	-
	Jalkh, BMC Med Genomics, 2017	Lebanon/Arabian	0	45	NGS (WES)	100% FHBC	-
	Vahteristo, Eur J Hum Genet, 2006	Finland/Caucasian	0	45	CSGE, then S	100% FHBOC	BRCA1/2neg	The majority of patients were BC patients, however small fraction of OC patients may also be included
		Finland/Caucasian	0	7	CSGE, then S	% not provided	-	7/7 also reported a personal history of OC
	Ghimenti, Genes Chromosomes Cancer, 2002	Italy/Caucasian	0	39	SSCP, then S	100% FHBOC	BRCA1/2neg	2/39 also reported a personal history of OC
	Guacci, J Clin Lab Anal, 2018	Italy/Caucasian	0	34	NGS	% not provided	-
	Glentis, Front Genet, 2019	Greece/Caucasian	0	30	NGS (WES)	37% FHBOC	BRCA1/2neg	1/30 also reported a personal history of OC
	Gervas, Mol Biol Rep, 2019	Russia/Asian	0	26	NGS	56% FHBOC	-
	Kiiski, Proc Natl Acad Sci USA, 2014	Finland/Caucasian	0	24	NGS (WES)	100% FHBOC	BRCA1/2neg	24 BC cases from 11 families
	Nunziato, Anal Chim Acta, 2019	Italy/Caucasian	0	22	NGS	100% FHBC	BRCA1/2neg (most of the group tested)
	Amemiya, Anticancer Res, 2015	Saudi Arabia, Canada/-	0	20	NGS	% not provided	-
	Coppa, Cancer Med, 2018	Italy/Caucasian	0	20	NGS	100% FHBOC	BRCA1/2neg	1/20 also reported a personal history of OC
	Spugnesi, Genes Chromosomes Cancer, 2016	Italy/Caucasian	0	19	NGS	25% FHBOC	-	TNBC
	Maksimenko, Hered Cancer Clin Pract, 2018	Latvia/Caucasian	0	15	NGS	67% FHBOC	BRCA1/2neg2	1/15 also reported a personal history of OC
	Sung, PLoS One, 2017	Taiwan/Asian	0	14	NGS	% not provided	-	1/14 also reported a personal history of OC
	Dominguez‑Valentin, Fam Cancer, 2018	Norway/Caucasian	0	13	NGS	46% FHBC	BRCA1/2neg	Multiple early-onset cancer patients (<46 years of age)
	Larouche, Endocrinol Diabetes Metab, 2019	Canada/-	0	9	NGS	% not provided	-	Patients with concurrent breast cancer and neuroendocrine tumours
	Eoh, Cancer Res Treat, 2018	South Korea/Asian	0	7	NGS	13% FHBOC	-	7/7 also reported a personal history of OC
	Li, J Ovarian Res, 2019	China/Asian	0	5	NGS	16% FHBOC	-	5/5 also reported a personal history of OC
	1, % of patients with a family history of breast cancer (FHBC), ovarian cancer (FHOC), breast/ovarian cancers (FHBOC) or all cancers (FHC); criteria for family history may differ between studies; 2, Negative for selected BRCA1/2 (i.e., founder mutations, family mutations) and/or tested negative with the technology routinely available at the time of diagnosis; CSGE, Conformation sensitive gel elec…
