# Supplementary material for: Summary of BARD1 Mutations and Precise Estimation of Breast and Ovarian Cancer Risks Associated with the Mutations
Source: Genes (Basel). 2020 Jul 15;11(7):798. doi: 10.3390/genes11070798 (PMC7397132; doi:10.3390/genes11070798)
Supplement: Supplementary file 1 [file genes-11-00798-s001.zip › Supplementary Figure and Tables_Suszynska et al_Genes/Supplementary Table S2_Suszynska et al_Genes.xlsx]

## Sheet: Table S2
	Table S2. The list of BARD1 mutations identified in patients with BC/OC, with their prevalence in BC/OC patients and population controls.
	Mutation ID (nt level)	Mutation ID (AA level)	Type/Subtype	dbSNP	Studies						non-cancer gnomAD			Reported in
					All		Predominantly European		Asian		All	European	Asian
					M/All OC [F(%)]	M/All BC [F(%)]	M/All OC [F(%)]	M/All BC [F(%)]	M/All OC [F(%)]	M/All BC [F(%)]	M/All Ctr [F(%)]	M/All Ctr [F(%)]	M/All Ctr [F(%)]
	c.3G>A	M1I	MSSTART	rs587780031		1/48717 ( 0.0021 )		1/24469 ( 0.0041 )						Susswein, Genet Med, 2016
	c.55G>T	E19*	N	rs752514155							7/118893 ( 0.0059 )
	c.70_71insGT	P24Rfs*35	FSINS	-							3/109801 ( 0.0027 )		3/23053 ( 0.013 )
	c.115_116delGC	A39Rfs*16	FSDEL	-							1/114026 ( 0.0009 )	1/49117 ( 0.0020 )
	c.158+1G>T		S	rs1553628351		1/48717 ( 0.0021 )		1/24469 ( 0.0041 )						Rizzolo, Int J Cancer, 2019
	c.159-1G>T		S	rs879254139		1/48717 ( 0.0021 )		1/24469 ( 0.0041 )						Weber-Lassalle, Breast Cancer Res, 2019
	c.159-2A>C		S	-		1/48717 ( 0.0021 )		1/24469 ( 0.0041 )						Weber-Lassalle, Breast Cancer Res, 2019
	c.172_173delAG	E59Afs*8	FSDEL (Microsatellite)	rs1057517589		1/48717 ( 0.0021 )		1/24469 ( 0.0041 )						Castera, Eur J Hum Genet, 2014
	c.215+1G>A		S	-	1/20799 ( 0.0048 )									Carter, Gynecol Oncol, 2018
	c.215+2T>C		S	rs1559441760							1/118292 ( 0.0008 )	1/51230 ( 0.0020 )
	c.225_228delAAGT	S76Tfs*19	FSDEL	-		1/48717 ( 0.0021 )								Lolas Hamameh, Int J Cancer, 2017
	c.247T>C	C83R	MS	rs1559437198		1/48717 ( 0.0021 )								Lolas Hamameh, Int J Cancer, 2017
	c.258T>A	C86*	N	-							1/118121 ( 0.0008 )		1/24033 ( 0.0042 )
	c.298C>T	Q100*	N	rs786201912		1/48717 ( 0.0021 )					1/118315 ( 0.0008 )	1/51329 ( 0.0019 )		Tung, Cancer, 2015
	c.334C>T	R112*	N	rs758972589	1/20799 ( 0.0048 )	6/48717 ( 0.0123 )	1/14231 ( 0.0070 )	2/24469 ( 0.0082 )		3/14734 ( 0.0204 )	2/118244 ( 0.0017 )	1/51261 ( 0.0020 )		González-Rivera, Breast Cancer Res Treat, 2016; Lilyquist, Gynecol Oncol, 2017; Sun, Clin Cancer Res, 2017; Weber-Lassalle, Breast Cancer Res, 2019
	c.373G>T	E125*	N	rs1553622720		2/48717 ( 0.0041 )				2/14734 ( 0.0136 )				Sun, Clin Cancer Res, 2017; Wang, Cancer Med, 2019
	c.373_377delGAAGA	E125*	FSDEL	-		1/48717 ( 0.0021 )				1/14734 ( 0.0068 )				Li, Int J Cancer, 2019
	c.395T>A	L132*	N	-							1/116636 ( 0.0009 )
	c.405delT	D135Efs*24	FSDEL	-		1/48717 ( 0.0021 )								Zheng, J Clin Oncol, 2018
	c.438G>A	W146*	N	-		1/48717 ( 0.0021 )				1/14734 ( 0.0068 )				Sun, Clin Cancer Res, 2017
	c.448C>T	R150*	N	rs730881411	2/20799 ( 0.0096 )	2/48717 ( 0.0041 )	2/14231 ( 0.0141 )	2/24469 ( 0.0082 )			2/118097 ( 0.0017 )	1/51193 ( 0.0020 )	1/24072 ( 0.0042 )	Lilyquist, Gynecol Oncol, 2017; Norquist, JAMA Oncol, 2016; Susswein, Genet Med, 2016; Weber-Lassalle, Breast Cancer Res, 2019
	c.496C>T	Q166*	N	rs786202500	1/20799 ( 0.0048 )		1/14231 ( 0.0070 )				1/118213 ( 0.0008 )	1/51237 ( 0.0020 )		Lilyquist, Gynecol Oncol, 2017
	c.507delA	D172Mfs*40	FSDEL	-		1/48717 ( 0.0021 )		1/24469 ( 0.0041 )						Weber-Lassalle, Breast Cancer Res, 2019
	c.513dupA	D172Rfs*10	FSDUP	rs746325928							4/118103 ( 0.0034 )
	c.539_540delAT	Y180*	FSDEL (Microsatellite)	rs779427628		2/48717 ( 0.0041 )				1/14734 ( 0.0068 )	3/133750 ( 0.0022 )	2/58881 ( 0.0034 )	1/24802 ( 0.004 )	Siraj, Hum Genet, 2017; Sun, Clin Cancer Res, 2017
	c.540T>A	Y180*	N	-		1/48717 ( 0.0021 )				1/14734 ( 0.0068 )				Sun, Clin Cancer Res, 2017
	c.547delG	V183Ffs*29	FSDEL	-							1/117879 ( 0.0008 )		1/23946 ( 0.0042 )
	c.580_581delAG	R194Gfs*2	FSDEL	-		1/48717 ( 0.0021 )		1/24469 ( 0.0041 )						Bonache, J Cancer Res Clin Oncol, 2018
	c.592delG	A198Lfs*14	FSDEL	rs876660761		1/48717 ( 0.0021 )				1/14734 ( 0.0068 )				Li, Int J Cancer, 2019
	c.601delA	R201Dfs*11	FSDEL	-							1/110242 ( 0.0009 )		1/21379 ( 0.0047 )
	c.614dupA	Q206Afs*8	FSDUP	rs1559425604	1/20799 ( 0.0048 )									Carter, Gynecol Oncol, 2018
	c.623dupA	K209Efs*5	FSDUP	rs587780033	1/20799 ( 0.0048 )	3/48717 ( 0.0062 )	1/14231 ( 0.0070 )	2/24469 ( 0.0082 )		1/14734 ( 0.0068 )	2/108211 ( 0.0018 )	1/48375 ( 0.0021 )		Kwong, J Mol Diagn, 2020; Ramus, J Natl Cancer Inst, 2015; Susswein, Genet Med, 2016; Yadav, Fam Cancer, 2017
	c.624dupG	K209Efs*5	FSDUP	rs1553622558		1/48717 ( 0.0021 )		1/24469 ( 0.0041 )						Weber-Lassalle, Breast Cancer Res, 2019
	c.627_628delAA	K209Nfs*4	FSDEL	rs864622223	1/20799 ( 0.0048 )	2/48717 ( 0.0041 )	1/14231 ( 0.0070 )	2/24469 ( 0.0082 )						Li, J Med Genet, 2016; Ramus, J Natl Cancer Inst, 2015; Thompson, J Clin Oncol, 2016
	c.632T>A	L211*	N	rs762171436		1/48717 ( 0.0021 )		1/24469 ( 0.0041 )						Tsaousis, BMC Cancer, 2019
	c.654G>A	W218*	N	rs1553622530		1/48717 ( 0.0021 )				1/14734 ( 0.0068 )				Wang, BMC Cancer, 2018
	c.659T>G	L220*	N	-							1/108311 ( 0.0009 )	1/48430 ( 0.0021 )
	c.808G>T	E270*	N	rs1060501288		1/48717 ( 0.0021 )				1/14734 ( 0.0068 )				Sun, Clin Cancer Res, 2017
	c.824T>A	L275*	N	rs765629130		1/48717 ( 0.0021 )		1/24469 ( 0.0041 )						Couch, J Clin Oncol, 2015
	c.860_861delAG	E287Vfs*5	FSDEL (Microsatellite)	rs786201868							1/117476 ( 0.0009 )	1/50846 ( 0.0020 )
	c.896_897insG	P300Sfs*2	FSINS	-		1/48717 ( 0.0021 )		1/24469 ( 0.0041 )						Couch, J Clin Oncol, 2015
	c.941T>A	L314*	N	-							1/118128 ( 0.0008 )
	c.947T>G	L316*	N	rs587781728		1/48717 ( 0.0021 )		1/24469 ( 0.0041 )						Tung, Cancer, 2015
	c.998_999delCT	S333*	FSDEL	-	1/20799 ( 0.0048 )						1/118290 ( 0.0008 )	1/51258 ( 0.0020 )		Eliade, Oncotarget, 2017
	c.1061C>A	S354*	N	-		1/48717 ( 0.0021 )		1/24469 ( 0.0041 )						Feliubadaló, Int J Cancer, 2019
	c.1111A>T	K371*	N	rs1364256214							1/15699 ( 0.0064 )
	c.1172C>A	S391*	N	-							1/15695 ( 0.0064 )	1/7713 ( 0.0130 )
	c.1205C>A	S402*	N	rs796666047							2/118231 ( 0.0017 )	1/51182 ( 0.0020 )
	c.1205C>G	S402*	N	rs796666047							1/15701 ( 0.0064 )	1/7714 ( 0.0130 )
	c.1212C>G	Y404*	N	rs587782681	2/20799 ( 0.0096 )		1/14231 ( 0.0070 )				3/133924 ( 0.0022 )	2/58887 ( 0.0034 )		Carter, Gynecol Oncol, 2018; Lilyquist, Gynecol Oncol, 2017
	c.1216C>T	R406*	N	rs377153250		3/48717 ( 0.0062 )		2/24469 ( 0.0082 )		1/14734 ( 0.0068 )	5/133914 ( 0.0037 )	3/58879 ( 0.0051 )	1/24883 ( 0.004 )	Sun, Clin Cancer Res, 2017; Weber-Lassalle, Breast Cancer Res, 2019
	c.1314+1G>A		S	rs753785671	1/20799 ( 0.0048 )	1/48717 ( 0.0021 )	1/14231 ( 0.0070 )			1/14734 ( 0.0068 )	1/118056 ( 0.0008 )	1/51107 ( 0.0020 )		Feliubadaló, Int J Cancer, 2019; Li, Int J Cancer, 2019
	c.1315-2A>G		S	-		2/48717 ( 0.0041 )		2/24469 ( 0.0082 )						Ratajska, Breast Cancer Res Treat, 2012; Weber-Lassalle, Breast Cancer Res, 2019
	c.1329delT	V444Lfs*31	FSDEL	rs767587416							1/118365 ( 0.0008 )		1/24095 ( 0.0042 )
	c.1338C>A	Y446*	N	-		2/48717 ( 0.0041 )				2/14734 ( 0.0136 )	2/118380 ( 0.0017 )	1/51316 ( 0.0020 )	1/24099 ( 0.0041 )	Kwong, J Mol Diagn, 2020; Sun, Clin Cancer Res, 2017
	c.1345C>T	Q449*	N	rs1553619721		2/48717 ( 0.0041 )				2/14734 ( 0.0136 )				Park, BMC Cancer, 2018
	c.1350dupT	G451Wfs*3	FSDUP	-		2/48717 ( 0.0041 )				2/14734 ( 0.0136 )				Sun, Clin Cancer Res, 2017
	c.1385G>A	W462*	N	rs1213894295							1/118384 ( 0.0008 )
	c.1396-1G>A		S	-		2/48717 ( 0.0041 )		1/24469 ( 0.0041 )						Weber-Lassalle, Breast Cancer Res, 2019; Zheng, J Clin Oncol, 2018
	c.1487C>G	S496*	N	rs1405646805		1/48717 ( 0.0021 )				1/14734 ( 0.0068 )	1/118399 ( 0.0008 )	1/51333 ( 0.0020 )		Ng, Clin Genet, 2016
	c.1509delG	N504Mfs*6	FSDEL	-		1/48717 ( 0.0021 )		1/24469 ( 0.0041 )						Rodríguez-Balada, Clin Biochem, 2020
	c.1525_1528dupATAG	V510Dfs*16	FSDUP	-		1/48717 ( 0.0021 )		1/24469 ( 0.0041 )						Couch, J Clin Oncol, 2015
	c.1539dupA	L514Tfs*11	FSDUP	-							1/118375 ( 0.0008 )	1/51305 ( 0.0020 )
	c.1622C>A	S541*	N	rs777937955		1/48717 ( 0.0021 )								González-Rivera, Breast Cancer Res Treat, 2016
	c.1639G>T	E547*	N	rs876658429	1/20799 ( 0.0048 )		1/14231 ( 0.0070 )							Lilyquist, Gynecol Oncol, 2017
	c.1648G>T	E550*	N	-		1/48717 ( 0.0021 )				1/14734 ( 0.0068 )				Sun, Clin Cancer Res, 2017
	c.1652C>G	S551*	N	rs587781707		7/48717 ( 0.0144 )		4/24469 ( 0.0163 )			3/118404 ( 0.0025 )	3/51335 ( 0.0058 )		Churpek, Breast Cancer Res Treat, 2015; Li, J Med Genet, 2016; Maxwell, Genet Med, 2015; Thompson, J Clin Oncol, 2016; Tung, Cancer, 2015; Weber-Lassalle, Breast Cancer Res, 2019
	c.1662_1665delTAGC	S555Tfs*4	FSDEL	-							1/118373 ( 0.0008 )
	c.1677+1G>A		S	-							1/118376 ( 0.0008 )		1/24107 ( 0.0041 )
	c.1678-1G>T		S	-							2/118371 ( 0.0017 )		2/24108 ( 0.0083 )
	c.1678-1_1684delGATGAACA		S	-							1/118379 ( 0.0008 )	1/51308 ( 0.0019 )
	c.1690C>T	Q564*	N	rs587780021	5/20799 ( 0.0240 )	16/48717 ( 0.0328 )	4/14231 ( 0.0281 )	15/24469 ( 0.0613 )			5/134075 ( 0.0037 )	5/59019 ( 0.0085 )		Carter, Gynecol Oncol, 2018; Cybulski, Int J Cancer, 2019; De Brakeleer, Clin Genet, 2016; Hajkova, Oncol Lett, 2019; Lilyquist, Gynecol Oncol, 2017; Lu, Nat Commun, 2015; Norquist, JAMA Oncol, 2016; Pritzlaff, Breast Cancer Res Treat, 2017; Ramus, J Natl Cancer Inst, 2015; Ratajska, Breast Cancer Res Treat, 2012; Shahi, BMC Cancer, 2019; Susswein, Genet Med, 2016; Tsaousis, BMC Cancer, 2019; Web…
	c.1765dupG	A589Gfs*5	FSDUP	-		1/48717 ( 0.0021 )		1/24469 ( 0.0041 )						Rizzolo, Int J Cancer, 2019
	c.1771delA	I591Ffs*14	FSDEL	-		1/48717 ( 0.0021 )		1/24469 ( 0.0041 )						Weber-Lassalle, Breast Cancer Res, 2019
	c.1811-1G>A		S	rs879253952		1/48717 ( 0.0021 )				1/14734 ( 0.0068 )				Li, Int J Cancer, 2019
	c.1819delG	607Lfs*12	FSDEL	-							1/118243 ( 0.0008 )	1/51181 ( 0.0020 )
	c.1822_1823insT	V609Cfs*4	FSINS	-		1/48717 ( 0.0021 )				1/14734 ( 0.0068 )				Jian, Hered Cancer Clin Pract, 2017
	c.1838_1841dupCAGT	Q615Sfs*21	FSDUP	-	1/20799 ( 0.0048 )				1/1534 ( 0.0652 )					Kwong, J Mol Diagn, 2020
	c.1886G>A	W629*	N	rs747446711							1/118335 ( 0.0008 )		1/24099 ( 0.0041 )
	c.1903+1G>A		S	-							1/118272 ( 0.0008 )		1/24084 ( 0.0042 )
	c.1904-2_1904-1delAG		S	-							1/118357 ( 0.0008 )		1/24106 ( 0.0041 )
	c.1905G>A	W635*	N	rs773223671							1/118356 ( 0.0008 )	1/51288 ( 0.0020 )
	c.1921C>T	R641*	N	rs587781948		6/48717 ( 0.0123 )		4/24469 ( 0.0163 )		2/14734 ( 0.0136 )	5/134075 ( 0.0037 )	2/59011 ( 0.0034 )		De Brakeleer, Clin Genet, 2016; Feliubadaló, Int J Cancer, 2019; Sun, Clin Cancer Res, 2017
	c.1932_1933delAT	C645*	FSDEL	rs587782504		1/48717 ( 0.0021 )		1/24469 ( 0.0041 )			1/15704 ( 0.0064 )	1/7714 ( 0.0130 )		Couch, J Clin Oncol, 2015
	c.1935_1954dup20	E652Vfs*69	FSDUP	rs587780024	1/20799 ( 0.0048 )	11/48717 ( 0.0226 )	1/14231 ( 0.0070 )	8/24469 ( 0.0327 )			14/134116 ( 0.0104 )	12/59050 ( 0.0204 )		Couch, J Clin Oncol, 2015; Cybulski, Int J Cancer, 2019; De Brakeleer, Hum Mutat, 2010; Lilyquist, Gynecol Oncol, 2017; Pritzlaff, Breast Cancer Res Treat, 2017; Susswein, Genet Med, 2016; Tung, Cancer, 2015; Weber-Lassalle, Breast Cancer Res, 2019
	c.1939C>T	Q647*	N	rs1350570988		1/48717 ( 0.0021 )		1/24469 ( 0.0041 )						Eliade, Oncotarget, 2017
	c.1993_1994delGA	E665Tfs*8	FSDEL	-		1/48717 ( 0.0021 )				1/14734 ( 0.0068 )				Wang, Cancer Med, 2019
	c.1996C>T	Q666*	N	rs730881422		3/48717 ( 0.0062 )		1/24469 ( 0.0041 )						Susswein, Genet Med, 2016; Tung, Cancer, 2015; Zheng, J Clin Oncol, 2018
	c.2001+1G>T		S	rs768490891							1/118414 ( 0.0008 )	1/51334 ( 0.0019 )
	c.2001+2T>C		S	-							1/118415 ( 0.0008 )		1/24105 ( 0.0042 )
	c.2002-2A>C		S	rs876658260		3/48717 ( 0.0062 )		3/24469 ( 0.0123 )						Couch, J Clin Oncol, 2015; Weber-Lassalle, Breast Cancer Res, 2019
	c.2002-2A>G		S	-		1/48717 ( 0.0021 )		1/24469 ( 0.0041 )			1/117810 ( 0.0008 )	1/50872 ( 0.0020 )		Hahnen, JAMA Oncol, 2017
	c.2050A>T	K684*	N	-							1/118324 ( 0.0008 )	1/51261 ( 0.0020 )
	c.2063dupA	D689Gfs*5	FSDUP	rs1064796026							1/15693 ( 0.0064 )
	c.2136dupC	V713Rfs*17	FSDUP	-							1/118410 ( 0.0008 )		1/24108 ( 0.0041 )
	c.2143C>T	Q715*	N	rs1553612164	1/20799 ( 0.0048 )		1/14231 ( 0.0070 )							Norquist, JAMA Oncol, 2016
	c.2148_2149delCA	I717Qfs*12	FSDEL	rs786203811	2/20799 ( 0.0096 )		2/14231 ( 0.0141 )				1/118420 ( 0.0008 )	1/51327 ( 0.0020 )		Lilyquist, Gynecol Oncol, 2017; Norquist, JAMA Oncol, 2016
	c.2167_2174delCATGCGAG	H723Tfs*4	FSDEL	-		1/48717 ( 0.0021 )				1/14734 ( 0.0068 )				Kwong, J Mol Diagn, 2020
	c.2199C>A	C733*	N	-							1/118401 ( 0.0008 )	1/51311 ( 0.0020 )
	c.2203C>T	Q735*	N	-		3/48717 ( 0.0062 )				1/14734 ( 0.0068 )	2/118398 ( 0.0017 )	1/51311 ( 0.0020 )	1/24108 ( 0.0041 )	Li, Int J Cancer, 2019; Lolas Hamameh, Int J Cancer, 2017
	c.2215dupT	Y739Lfs*2	FSDUP	-		1/48717 ( 0.0021 )								Torrezan, Front Genet, 2018
	c.2229dupT	N744*	FSDUP	rs1259296823							1/118390 ( 0.0008 )
	c.2267G>A	p.Trp756Ter	N	rs1358155595							1/118357 ( 0.0008 )
	c.2290dupA	p.Ile764AsnfsTer8	FSDUP	rs587780030							1/118345 ( 0.0008 )		1/24108 ( 0.0041 )
	c.2296_2297delTG	V767Dfs*4	FSDEL (Microsatellite)	rs750413473	1/20799 ( 0.0048 )	1/48717 ( 0.0021 )	1/14231 ( 0.0070 )	1/24469 ( 0.0041 )			8/134018 ( 0.0060 )	5/58957 ( 0.0085 )		Couch, J Clin Oncol, 2015; Ramus, J Natl Cancer Inst, 2015
	c.2301_2303delGATinsACATC	M768Hfs (Stopcodon lost)	FSINDEL	-		1/48717 ( 0.0021 )				1/14734 ( 0.0068 )				Ng, Clin Genet, 2016
	M, number of cases/controls with mutation; All, total number of cases/controls tested; BC, breast cancer cases; Ctr, non-cancer gnomAD controls; OC, ovarian cancer cases; FSDEL, a frameshift mutation – deletion; FSDUP, a frameshift mutation – duplication; FSINS, a frameshift mutation – insertion; FSINDEL, a frameshift mutation – insertion and deletion; MS, a missense mutation; MSSTART, a missense…
